# Supplementary material for: Organosilica-metallic sandwich materials as precursors for palladium and platinum nanoparticle synthesis
Source: Royal Society of Chemistry journal article supplement (doi:10.1039/c5ra15871k), 2015-01-01
Supplement: c5ra15871k1.pdf [file c5ra15871k1.pdf]

## Supplementary Information

### Organosilica-Metallic Sandwiches Materials as Precursors for Palladium and Platinum Nanoparticle Synthesis

5 Romain Besnard, Julien Cambedouzou, Guilhem Arrachart\*, Xavier F. Le Goff and Stéphane Pellet-Rostaing

Institut de Chimie Séparative de Marcoule, UMR 5257 CEA/CNRS/UM/ENSCM, BP17171, F-30207 Bagnols-sur-Cèze, France.

10

|                    |        |
|--------------------|--------|
| Figure S1 .....    | page 2 |
| Figure S2 .....    | page 2 |
| 15 Figure S3 ..... | page 3 |

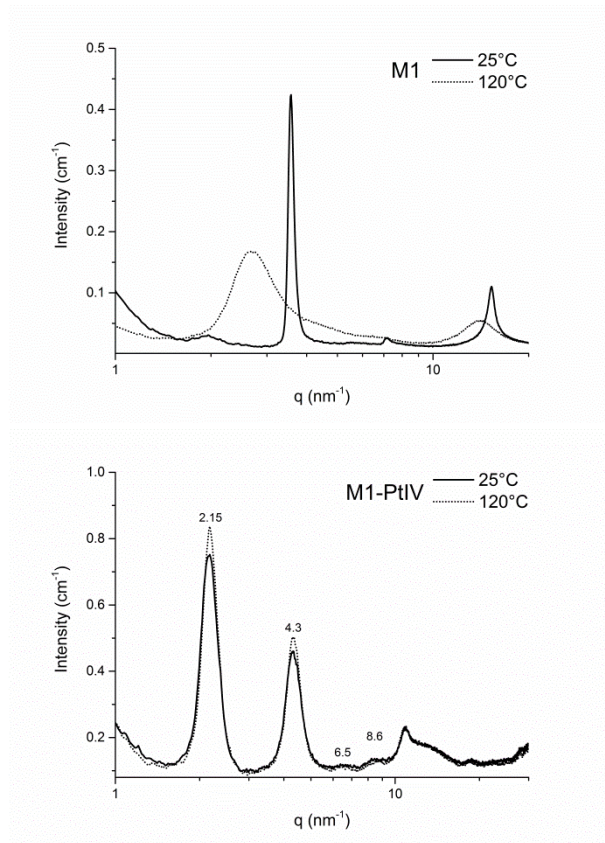

**Fig. S1** *In situ* SAXS experiment of M1 and M1-Pt(IV) materials at 25°C and 120°C.

20

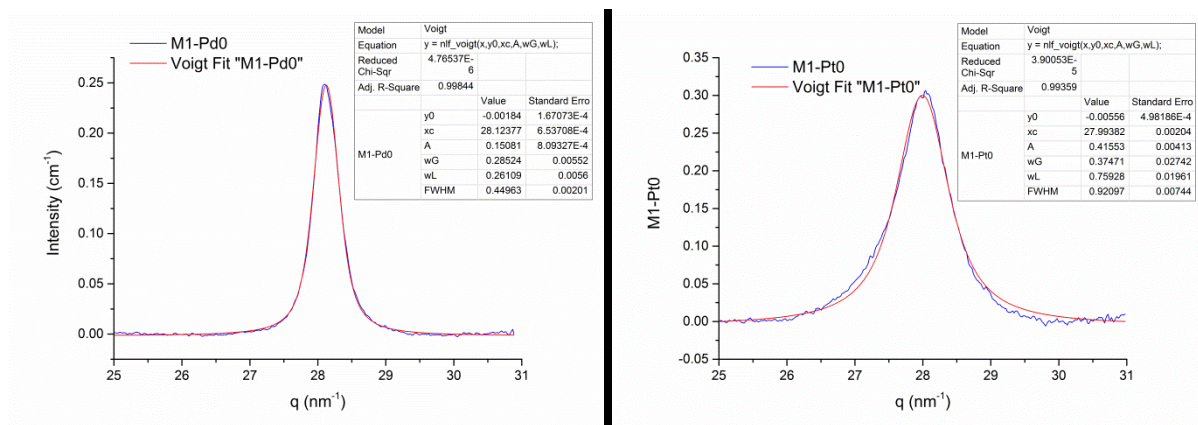

25

**Fig. S2** SAXS patterns of M1-Pd(0) and M1-Pt(0) in the range of 25 nm<sup>-1</sup> to 31 nm<sup>-1</sup> and the corresponding fits of structure peak.

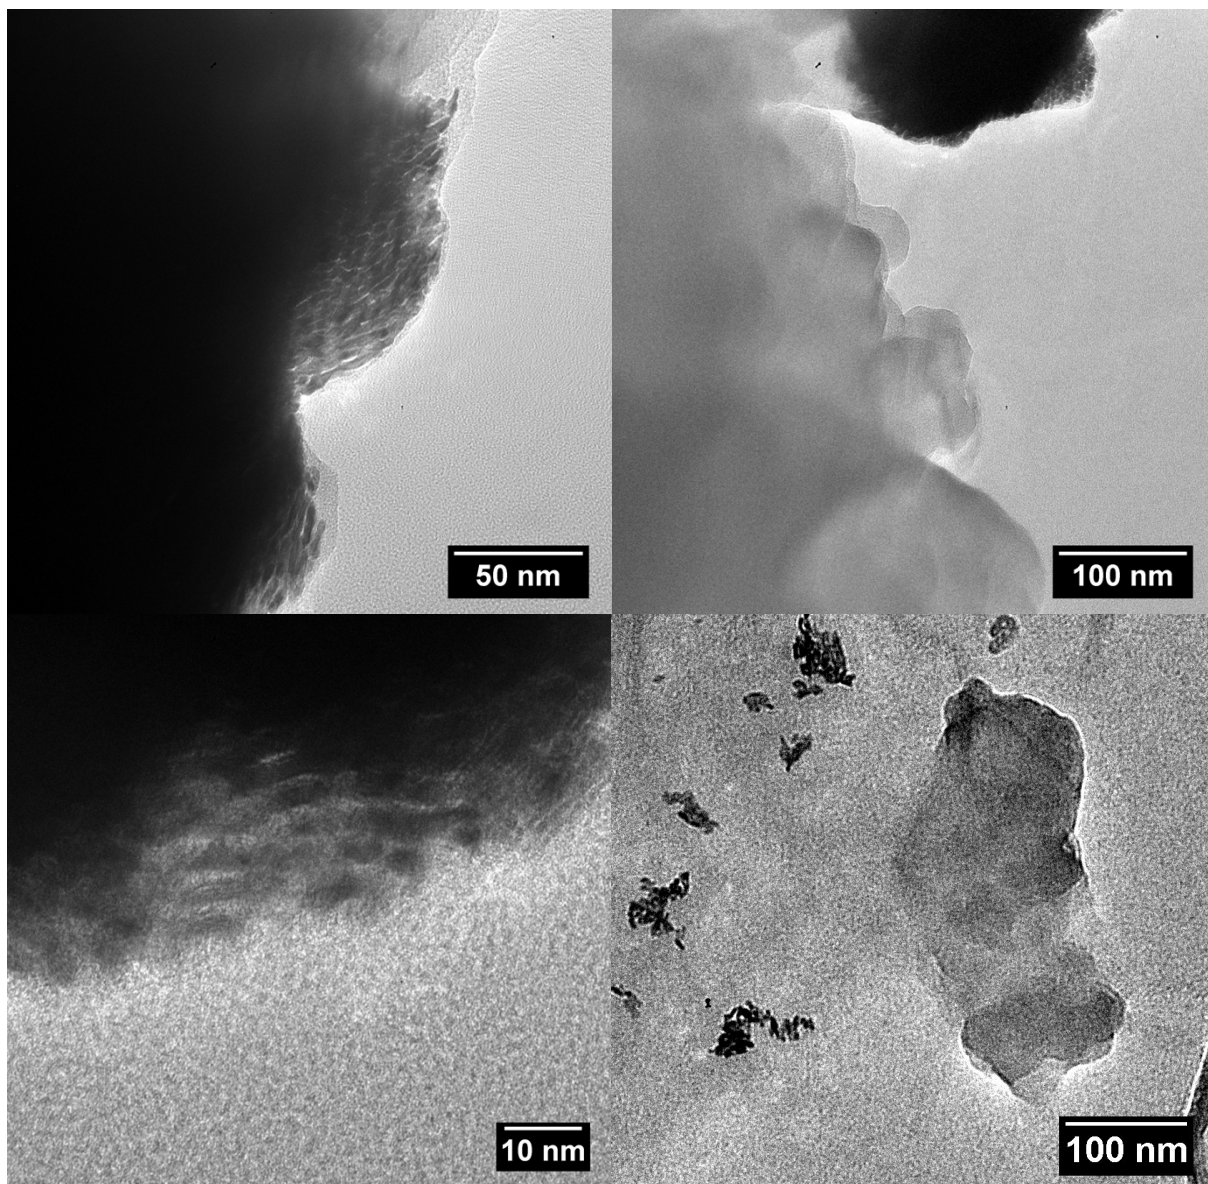

30 **Fig. S3** TEM images of M1-Pt(0) material.
